# Supplementary material
Source: PubMed Central journal article supplement (PMC2814784)

**Supplemental Table1: siRNA's used for RNAi experiments**

|         |                                                                                                                         |
|---------|-------------------------------------------------------------------------------------------------------------------------|
| MobKL1A | 5'-GGUAAAUGUUGAUACGAAUU-3'<br>5'-GCACCAAAGUAUAUUGAUUUU-3'<br>5'-GCAGAUUGGAACGAACAUAUU-3'<br>5'-AUGAAUGGGUUGCAGUUAAUU-3' |
| MobKL1B | 5'-GAGACAAGCUGUUAUGUUGUU-3'<br>5'-UUAACCAGAUAACAUGUUUU-3'<br>5'-CAAAGACUAUUCUAAAGCGUU-3'<br>5'-GAAGCAAGCUGUCCAGUCAUU-3' |
| INCENP  | 5'-GUCAUGAAGUCCUUUAUUA-3'<br>5'-GGAUGGAUCUGAAUAGCGA-3'<br>5'-CAACGGAAAUAACUCGUGG-3'<br>5'-CGGAAGAAGAGACGGAUUU-3'        |
| PLK     | 5'-GCACAUACCGCCUGAGUCU-3'<br>5'-CCACCAAGGUUUUCGAUUG-3'<br>5'-GCUCUCAAUGACUCAACA-3'<br>5'-UCUCAAGGCCUCCUAAUAG-3'         |
| BubR1   | 5'-CAAUACAGCUUCACUGAUUU-3'<br>5'-GCAAUGAGCCUUUGGAUUAUU-3'<br>5'-GAAACGGGCAUUUGAAUAUU-3'<br>5'-GAUGGUGAAUUGUGGAAUAUU-3'  |
| Control | 5'-UAGCGACUAAACACAUCAA-3'                                                                                               |

**Supplemental Table 2: Primers used for Quantitative PCR experiments.**

|                          |                                                           |
|--------------------------|-----------------------------------------------------------|
| <b>MobKL1A NM_173468</b> | 5'-ggtgatgctgaactgtgagg-3'<br>5'-cctcaatecctaccctcag-3'   |
| <b>MobKL1B NM_018221</b> | 5'-tctgaggaccgaagatgagc-3'<br>5'-ccgacaatacaacggactccc-3' |
| <b>MobKL2B NM_024761</b> | 5'-ctaaccaagcagcctgaacc-3'<br>5'-gggatgtagagaaaaccggt-3'  |
| <b>MobKL2C NM_145279</b> | 5'-tggagtctgtctcccatcc-3'<br>5'-cgataggtgtccctctgacc-3'   |
| <b>MobKL2A NM_130807</b> | 5'-cagggtttcaccgtgttagc-3'<br>5'-ccttgctacaggtgaaacga-3'  |
| <b>GAPDH NM_002046</b>   | 5'-caatgacccttcattgacc-3'<br>5'-gctctagggaggttttagtt-3'   |
| <b>ACTIN NM_001101</b>   | 5'-agaaaatctggcaccacacc-3'<br>5'-cgatagggacatgaggagac-3'  |

**Supplemental Table 3: List of organisms, gene names and ascension numbers used to construct the dendrogram in Figure 1A.**

| <b>Organism</b>        | <b>Gene Name</b> | <b>Alternative Gene Names</b>                          | <b>Ascension #</b> |
|------------------------|------------------|--------------------------------------------------------|--------------------|
| <i>G. lamblia</i>      | MOB1             | ATC 50803                                              | XM_001709385       |
| <i>S. cerevisiae</i>   | MOB1             | Mob1p, YIL106W                                         | NP_012160          |
| <i>S. pombe</i>        | MOB1             | SPBC428                                                | NM_001021098       |
| <i>H. sapiens</i>      | MOBKL1A          | MATS2, MOB4A, Mob1B                                    | NM_173468          |
| <i>M. musculus</i>     | MOBKL1A          | MGC129510, MGC129511                                   | NM_026735          |
| <i>X. tropicalis</i>   | MOBKL1A          | Mats2, Mob1b, Mob4A                                    | NM_001079104       |
| <i>D. rerio</i>        | MOBKL1A          | zgc:56156, zgc:77872                                   | NM_200200          |
| <i>D. rerio</i>        | MOBKL1B          | zgc:111840, C2orf6, MOB1, MOBK1B, Mob4B, cb512         | NM_214783          |
| <i>M. musculus</i>     | MOBKL1B          | MOB1, MOB4B, Mobk1b                                    | NM_145571          |
| <i>H. sapiens</i>      | MOBKL1B          | MATS1, MOB1, MOBK1B, Mob4B, C2orf6, FLJ10788, FLJ11595 | NM_018221          |
| <i>X. tropicalis</i>   | MOBKL1B          | MOB1, Mats1, Mob4b, Mobkl1b                            | NM_001017026       |
| <i>D. melanogaster</i> | MATS             | DMob1, Dme1, SCG13852                                  | NM_142784          |
| <i>S. purpuratus</i>   | MOB1             | Mob1                                                   | XM_787632          |
| <i>A. thaliana</i>     | MOB1             | AT5G45550, AT5G20430                                   | NM_118023          |
| <i>O. sativa</i>       | MOB1B            |                                                        | NM_001071066       |
| <i>O. sativa</i>       | MOB1A            |                                                        | NM_001057076       |
| <i>D. rerio</i>        | MOBKL2A          | zgc:56681, zgc:77552                                   | NM_199716          |
| <i>X. tropicalis</i>   | MOBKL2A          | Mobkl2c, moblak                                        | NM_001011080       |
| <i>H. sapiens</i>      | MOBKL2A          | MOB LAK, MOB-LAK                                       | NM_130807          |
| <i>M. musculus</i>     | MOBKL2A          | MOB1                                                   | NM_172457          |
| <i>M. musculus</i>     | MOBKL2B          | MGC28359, Mob3b                                        | NM_178061          |
| <i>H. sapiens</i>      | MOBKL2B          | Mob3B                                                  | NM_024761          |
| <i>X. tropicalis</i>   | MOBKL2B          | Mob3B, Mobkl2a                                         | NM_001016616       |
| <i>M. musculus</i>     | MOBKL2C          | MOB3C                                                  | NM_175308          |
| <i>D. rerio</i>        | MOBKL2C          | zgc:92408                                              | NM_145729          |
| <i>D. melanogaster</i> | MOB1             | Mob3, DMob3, Mob3-PA                                   | NM_0135520         |
| <i>T. brucei</i>       | MOB1B            |                                                        | XM_841088          |
| <i>T. brucei</i>       | MOB1A            |                                                        | XM_841087          |
| <i>L. major</i>        | MOB1             |                                                        | XM_001680815       |

## **Supplemental figure legends**

### **Supplemental Figure 1. GFP-Mob1C and Mob1D localization in HeLa cells.**

HeLa cells were transfected with GFP-Mob1C and Mob1D, and were fixed 24 hr post-transfection. Panels A-H show optical sections of cells in prometaphase, metaphase, anaphase, and late cytokinesis, respectively. Bar, 10  $\mu\text{m}$ .

### **Supplemental Figure 2. Localization of GFP-tagged and endogenous Mob1A.**

**A.** HeLa cells transiently expressing GFP-Mob1A were counterstained for endogenous Mob1A with an antibody directed against the N-terminus of MobKL1B (A-L).

Additionally, HeLa cells processed for endogenous Mob1 and tubulin (M-O) to visualize Mob1 localization in the absence of the GFP-tagged construct. Note that in the optical sections shown in Panels A, D and M, one or both spindle poles are not visible in the focal plane. Bar, 10  $\mu\text{m}$ . **B.** Confirmation of the specificity of the Mob1A antibody was confirmed by western blot. **C.** Transient expression of untagged EGFP in HeLa cells. Bar, 10  $\mu\text{m}$ .

### **Supplemental Figure 3: Regulation of Mob1C and Mob1D recruitment to spindle poles.**

GFP-Mob1C and GFP-Mob1D-expressing HeLa cells were transfected with non-targeting control (left panels)- and Plk1 siRNA (right panels). Twenty-four hours post-siRNA transfection, cells were processed for localization of  $\gamma$  tubulin and Plk1. Similar to Mob1A, in the absence of Plk1, cells formed a monopolar spindle, and while both

Mob1C and Mob1D localization was lost from the centrally located spindle pole while kinetochore localization was unaffected (D, J, O and U). Bar, 10  $\mu$ m.

**Supplemental Figure 4: Confirmation of Plk1 and INCENP depletion in HeLa cells.**

GFP-Mob1A-expressing HeLa cells were transfected with non-targeting control, Plk1, or INCENP siRNA. Twenty-four hours post-siRNA transfection, cells were lysed for Western blotting and probed for the target proteins, and then reprobbed for tubulin as a loading control.

**Supplemental Figure 5. Regulation of Mob1C and Mob1D recruitment to kinetochores.**

GFP-Mob1C and GFP-Mob1D-expressing HeLa cells were transfected with non-targeting control and INCENP siRNA. Twenty-four hours post- transfection, cells were processed for localization of Hec1 and INCENP. As was found with GFP-Mob1A, when INCENP was depleted, Mob1C and Mob1D no longer localized on the kinetochore, but spindle pole localization was unaffected (D, J, O and U). Bar, 10  $\mu$ m.

**Supplemental Figure 6: Mob1C and Mob1D localization to the kinetochore is lost when Aurora B is inhibited.**

GFP-Mob1C and GFP-Mob1D-expressing HeLa cells were transfected were treated with 200nM nocodazole for 3hr, and then released into 0.1% DMSO (A-D and I-L) or 5 $\mu$ M ZM477439 (E-H and M-P) for an additional 30min. Cells were fixed and counter-stained with phospho- (Ser10) histone H3 (B, F, J and N). Note that while spindle pole

localization was maintained in cells with compromised Aurora B activity, kinetochore localization was lost (E and M). Bar, 5  $\mu\text{m}$ .

# Mob1C

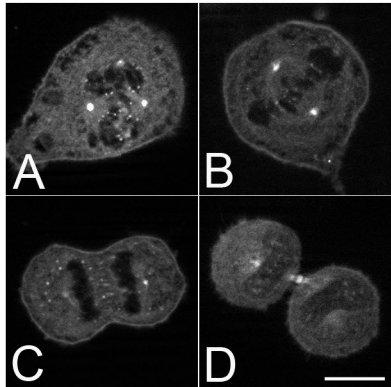

# Mob1D

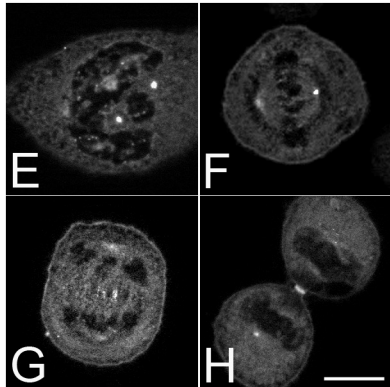

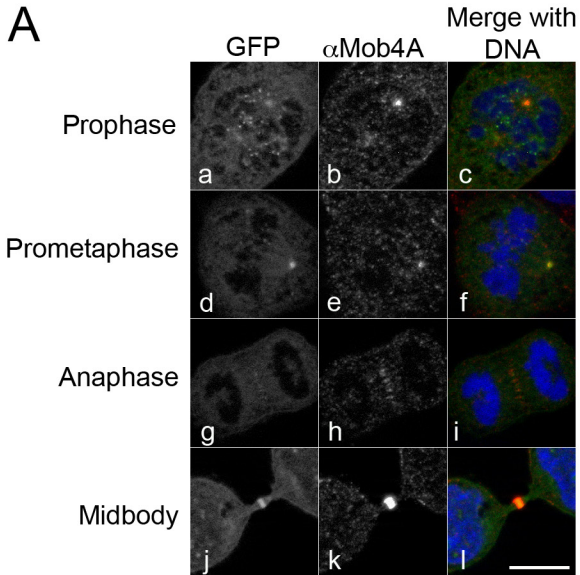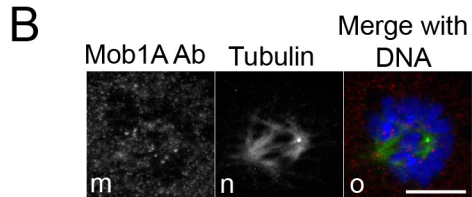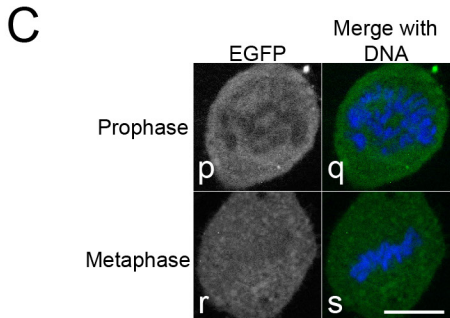

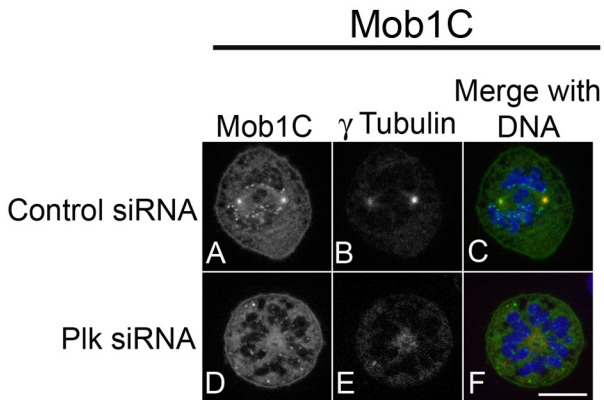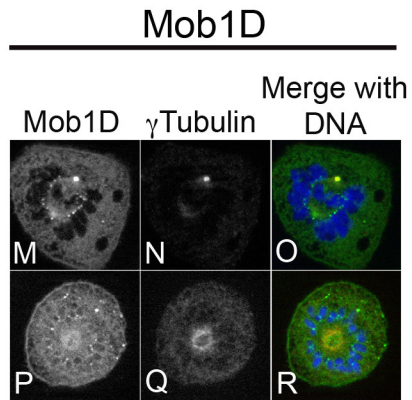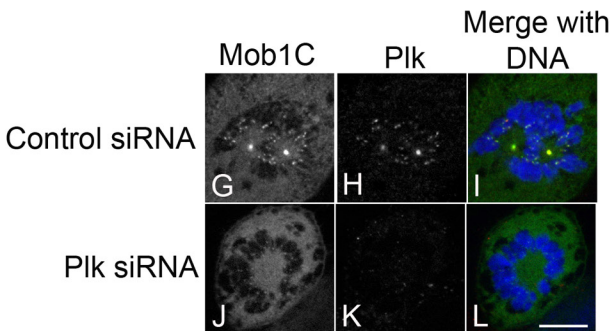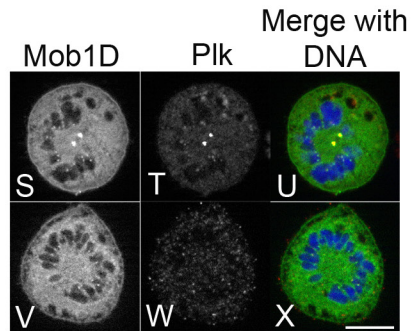



PIK RNAi

---

Control

PIK

PIK

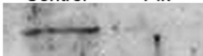

Tubulin

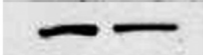

INCENP RNAi

---

Control

INCENP

Incenp

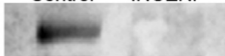

Tubulin

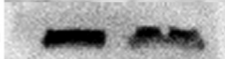

## Mob1C

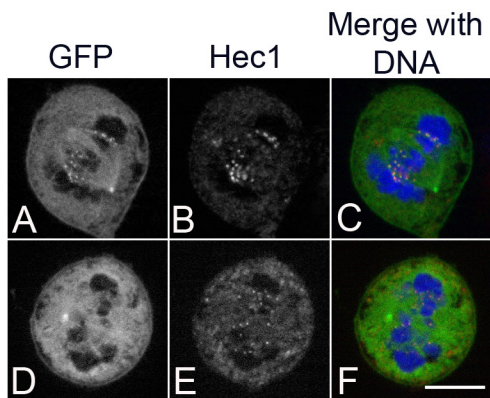

## Mob1D

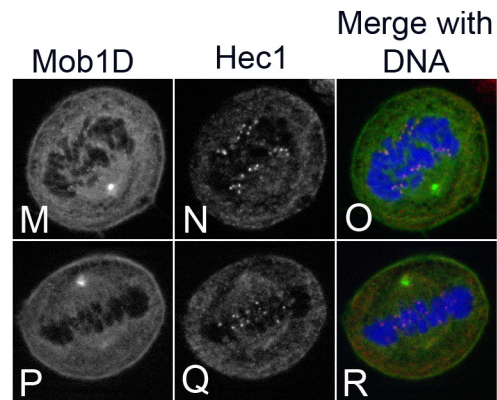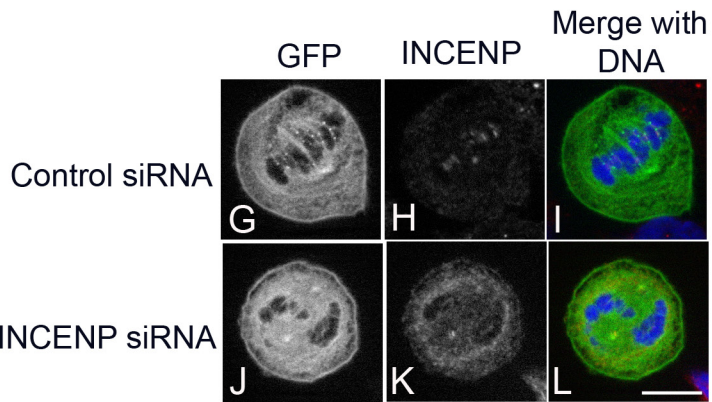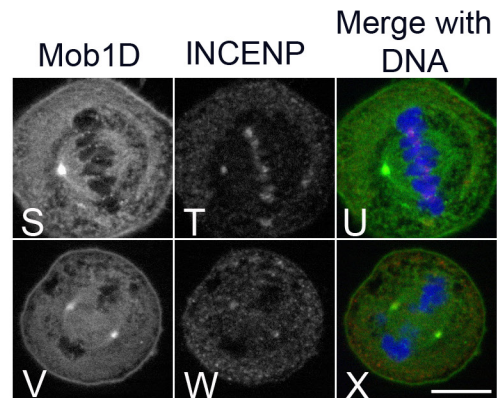

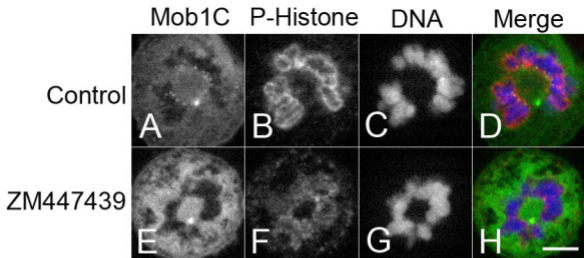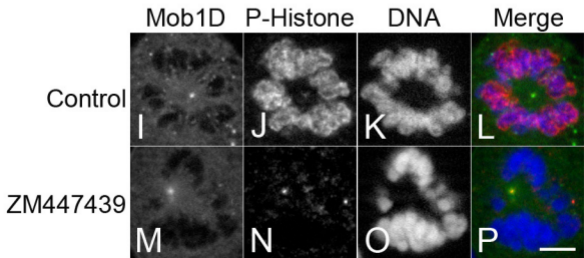

Supplement: E09-06-0471_1.pdf [file E09-06-0471_1.pdf]
